# Supplementary material for: Sources of organic gases and aerosol particles and their roles in nighttime particle growth at a rural forested site in southwest Germany
Source: Copernicus journal article supplement (doi:10.5194/egusphere-2023-2255), 2023-11-29
Supplement: Supplementary file 1 [file egusphere-2023-2255-supplement.pdf]

## Supplement for

### Sources of organic gases and aerosol particles and their roles in nighttime particle growth at a rural forested site in southwest Germany

Junwei Song<sup>1,2,3</sup>, Harald Saathoff<sup>1,3</sup>, Feng Jiang<sup>1,2</sup>, Linyu Gao<sup>1,2,3</sup>, Hengheng Zhang<sup>1</sup> and Thomas Leisner<sup>1</sup>

<sup>1</sup> Institute of Meteorology and Climate Research, Karlsruhe Institute of Technology, Hermann-von-Helmholtz-Platz 1, 76344 Eggenstein-Leopoldshafen, Germany

<sup>2</sup> Institute of Geography and Geoecology, Karlsruhe Institute of Technology, Reinhard-Baumeister-Platz 1, 76131, Karlsruhe, Germany

<sup>3</sup> Now at Univ. Lyon, Université Claude Bernard Lyon 1, CNRS, IRCELYON, 69626 Villeurbanne, France

#### Text S1. Data processing of CHARON-PTR-MS

The raw data of CHARON-PTR-MS was processed by the Ionicon Data Analyzer (IDA 1.0.2, Ionicon Analytik). Mass calibrations were performed using four ion peaks including  $\text{H}_3^{18}\text{O}^+$  at  $m/z$  21.0226,  $\text{C}_3\text{H}_6\text{OH}^+$  at  $m/z$  59.0491,  $\text{C}_6\text{H}_5\text{I}^+$  at  $m/z$  203.943 and  $\text{C}_6\text{H}_5\text{I}_2^+$  at  $m/z$  330.848, where  $\text{C}_6\text{H}_5\text{I}^+$  and  $\text{C}_6\text{H}_5\text{I}_2^+$  were produced from the internal standard diiodobenzene. High-resolution peak fitting for each ion was performed automatically by the IDA software and refined manually according to the database of PTR-ToF-MS literature (Pagonis et al., 2019; Yáñez-Serrano et al., 2021). The quantification procedure of CHARON-PTR-MS data has been described in detail by (Muller et al., 2017). The collision rate ( $k$ ) between the analyte molecules and reagent ions ( $\text{H}_3\text{O}^+$ ) is calculated based on the parametrization method (Su, 1988). This method uses the properties of the analyte molecule as input parameters: (i) its molecular weight, (ii) its molecular polarizability which is calculated from the elemental composition using the parametrization method (Bosque and Sales, 2002) and (iii) its dipole moment which is assumed to be 0.3 and 2.75 D for pure and substituted hydrocarbons, respectively. The estimated accuracy of this quantification method is  $\pm 30\%$ . Further data analyses including gas and particle data separation, and background subtraction were performed with custom-in MATLAB scripts in IDA. Since the PTR-MS shows slow responses to some organic species especially oxidized species in the particle phase (Piel et al., 2021), the initial 290 s particle-phase data at each CHARON measurement cycle were excluded. Then the processed particle data were corrected by the interpolate subtraction of HEPA filter background. For the gas phase data, we excluded the first 10 s and the last 10 s data at each VOC

measurement cycle to avoid any inferences due to the switching between different measurement modes. Then we subtracted the gas background from the measurement of VOC-free synthetic air. Finally, we averaged the gas and particle phase background-corrected data into 5 min presented in this study.

The PTR-MS suffers the ionic fragmentation during the protonation processes (Yuan et al., 2017). According to gas calibrations, the residual fractions were on average  $17\% \pm 2\%$  and  $37\% \pm 1\%$  for protonated isoprene ( $C_5H_9^+$ ,  $m/z69.07$ ) and monoterpenes ( $C_{10}H_{17}^+$ ,  $m/z137.13$ ) respectively after their fragmentation within the instrument. Based on the calibration of  $\beta$ -caryophyllene for our instrument in the lab (Gao et al., 2022), we assumed all sesquiterpenes following the similar fragmentation pattern of  $\beta$ -caryophyllene with  $29\% \pm 1\%$  at protonated sesquiterpene mass ( $C_{15}H_{25}^+$ ,  $m/z205.20$ ). Finally, we scaled the measured data of  $C_5H_9^+$ ,  $C_{10}H_{17}^+$  and  $C_{15}H_{25}^+$  for the mixing ratios of isoprene, monoterpenes and sesquiterpenes in this study. For the calibrated aromatic hydrocarbon species (benzene, toluene, xylenes, trimethylbenzene) and acetone, they have minor fragmentation and thus no further correction for their mixing ratios. Besides, no further correction was made for other uncalibrated VOC species.

### **Text S2. Comparison with the air quality monitor station data**

The hourly particle mass and trace gas data (i.e.,  $PM_{2.5}$ ,  $PM_{10}$ ,  $O_3$ ,  $NO_2$ ,  $NO$  and  $SO_2$ ) were retrieved from the air quality monitor station of Eggenstein (LUBW), located  $\sim 2.5$  km southwest of our sampling site (<https://udo.lubw.baden-wuerttemberg.de/public/>, last access: 1/25/2022). We compared the available data ( $PM_{2.5}$ ,  $PM_{10}$ ,  $O_3$  and  $NO_2$ ) at KITcn to those obtained from the Eggenstein monitor station. As shown in Figs. S2 and S3, good correlations were found for the particle mass concentrations measured at these two locations ( $r = 0.91$  for  $PM_{2.5}$  and  $0.76$  for  $PM_{10}$ ). A good linear correlation was also observed for the  $O_3$  data ( $r = 0.86$ ), but a poor correlation was found for the  $NO_2$  data ( $r = 0.27$ ). This is expected due to traffic emissions at Eggenstein station, which could lead to more spikes of  $NO_2$  (Fig. S2). If peak values of  $NO_2$  at the Eggenstein monitor station were removed, a better correlation for  $NO_2$  was observed for both locations ( $r = 0.64$ ).

### **Text S3. Estimation of particulate organic nitrate from AMS data**

The derived ratio of  $\text{NO}_2^+/\text{NO}^+$  from AMS data can be used as an indicator for the formation of organic nitrate (Kiendler-Scharr et al., 2016; Xu et al., 2015; Farmer et al., 2010). Here we used the measured  $\text{NO}_2^+/\text{NO}^+$  ratios to estimate the fraction of organic nitrate ( $\text{OrgNO}_3$ ), although this estimation requires accurate ratios for pure ammonium nitrate and organic nitrate. In this study, the average ratio of  $\text{NO}_2^+/\text{NO}^+$  for calibration using pure ammonium nitrate ( $\text{NH}_4\text{NO}_3$ ) three times is 0.61, which is within the ranges (0.29-0.85) reported in previous observations in Europe (Kiendler-Scharr et al., 2016). Based on previous chamber and field studies on organic nitrates, we adopted a fixed value of  $\text{NO}_2^+/\text{NO}^+$  with 0.1 for organic nitrates ( $R_{\text{OrgNO}_3}$ ). The mass fraction and concentration ( $p\text{OrgNO}_3_{\text{Frac}}$  and  $p\text{OrgNO}_3_{\text{Mass}}$ ) can be calculated using the following equations:

$$p\text{OrgNO}_3_{\text{Frac}} = \frac{(1 + R_{\text{OrgNO}_3}) * (R_{\text{meas}} - R_{\text{calib}})}{(1 + R_{\text{meas}}) * (R_{\text{OrgNO}_3} - R_{\text{calib}})}$$

$$p\text{OrgNO}_3_{\text{Mass}} = p\text{OrgNO}_3_{\text{Frac}} * \text{NO}_3$$

where  $R_{\text{meas}}$  is the measured ratios of  $\text{NO}_2^+$  and  $\text{NO}^+$  ions from AMS data,  $R_{\text{calib}}$  is the ratio in the calibration of  $\text{NH}_4\text{NO}_3$ . It should be noted that  $p\text{OrgNO}_3$  calculated from AMS data only indicate the nitrate functional group of organic nitrates. We converted the mass concentrations of  $p\text{OrgNO}_3$  to  $\text{OrgNO}_3$  scaled by a factor of 4.2 based on the molecular weight of organic nitrate with  $260 \text{ g mol}^{-1}$  from the FIGAERO-CIMS measurement.

As shown in Fig. S11, we also observed that  $\text{C}_{10}\text{H}_{15}\text{O}_7\text{N}$  and  $\text{C}_{15}\text{H}_{23}\text{O}_7\text{N}$  showed better correlations with the calculated  $\text{OrgNO}_3$  from the AMS compared to  $\text{C}_5\text{H}_7\text{O}_7\text{N}$ . Note that these three particulate molecules measured by the FIGAERO-CIMS the have been proposed as the major oxidation products of isoprene, monoterpenes and sesquiterpenes respectively with nitrate radicals in the field or chamber studies (Huang et al., 2019; Chen et al., 2020; Gao et al., 2022).

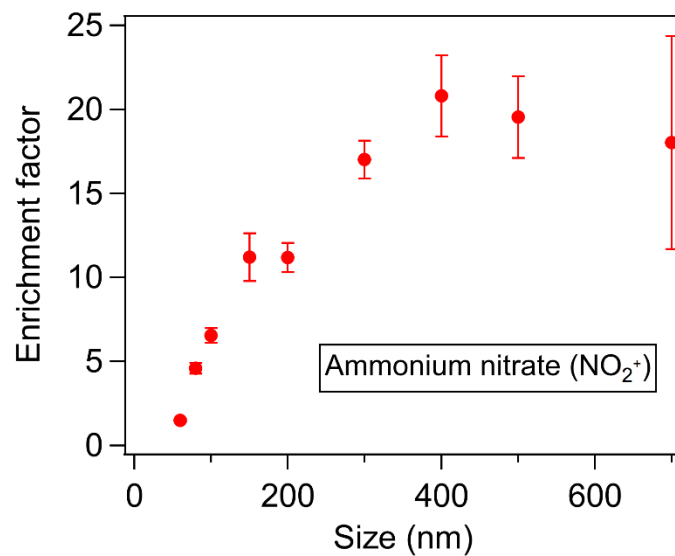

**Figure S1.** Calibrated enrichment factor of ammonium nitrate particles as a function of particle size in the 60-700 nm range

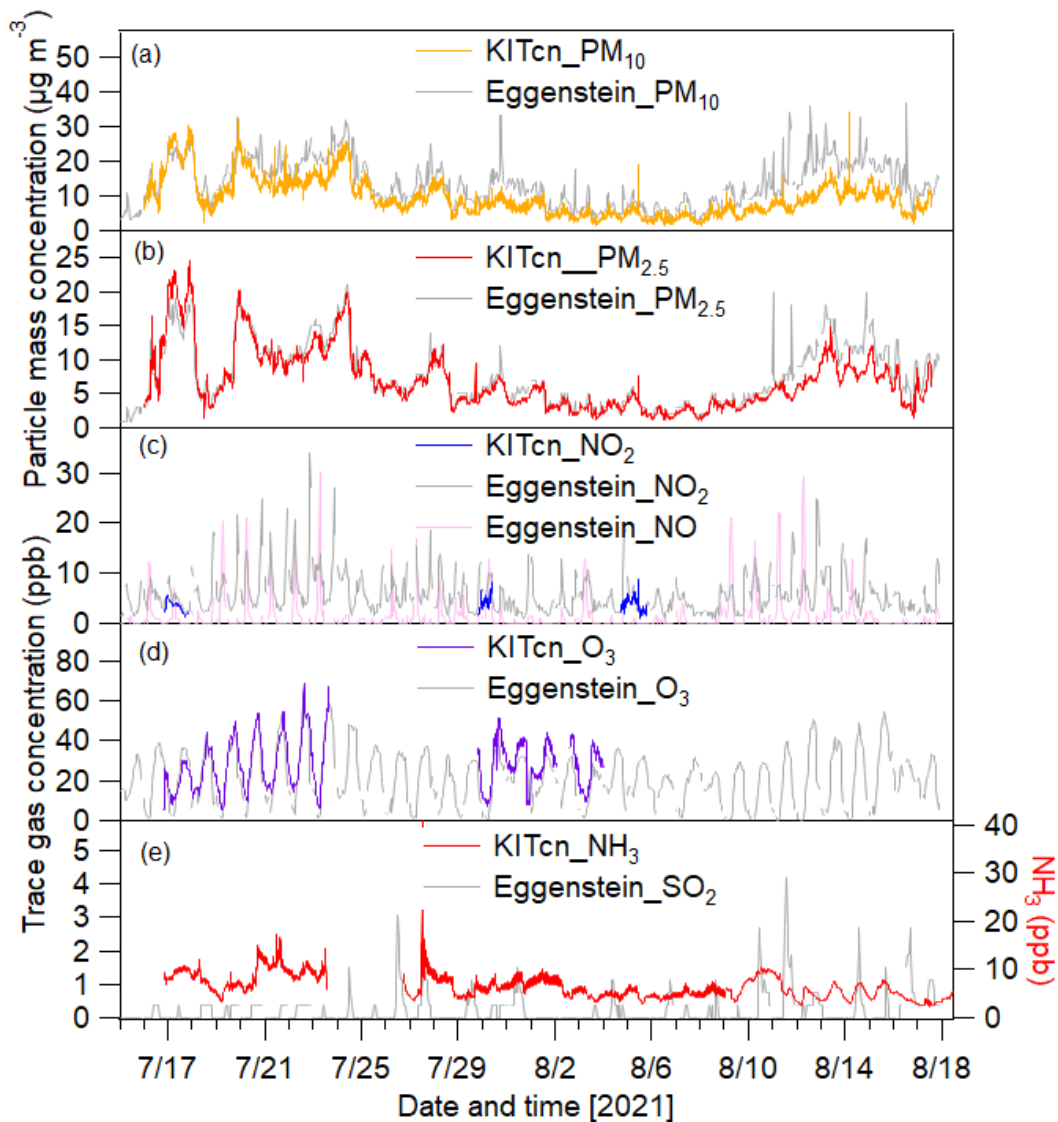

**Figure S2.** Time series of (a) PM<sub>10</sub>, (b) PM<sub>2.5</sub>, (c) NO<sub>2</sub> and NO, (d) O<sub>3</sub> and (e) SO<sub>2</sub> and NH<sub>3</sub> observed at the sampling site (KITcn) and Eggenstein air quality monitor station during the measurement period. The trace gas data of NO<sub>2</sub> and O<sub>3</sub> are only available for few days due to malfunction of the data acquisition software.

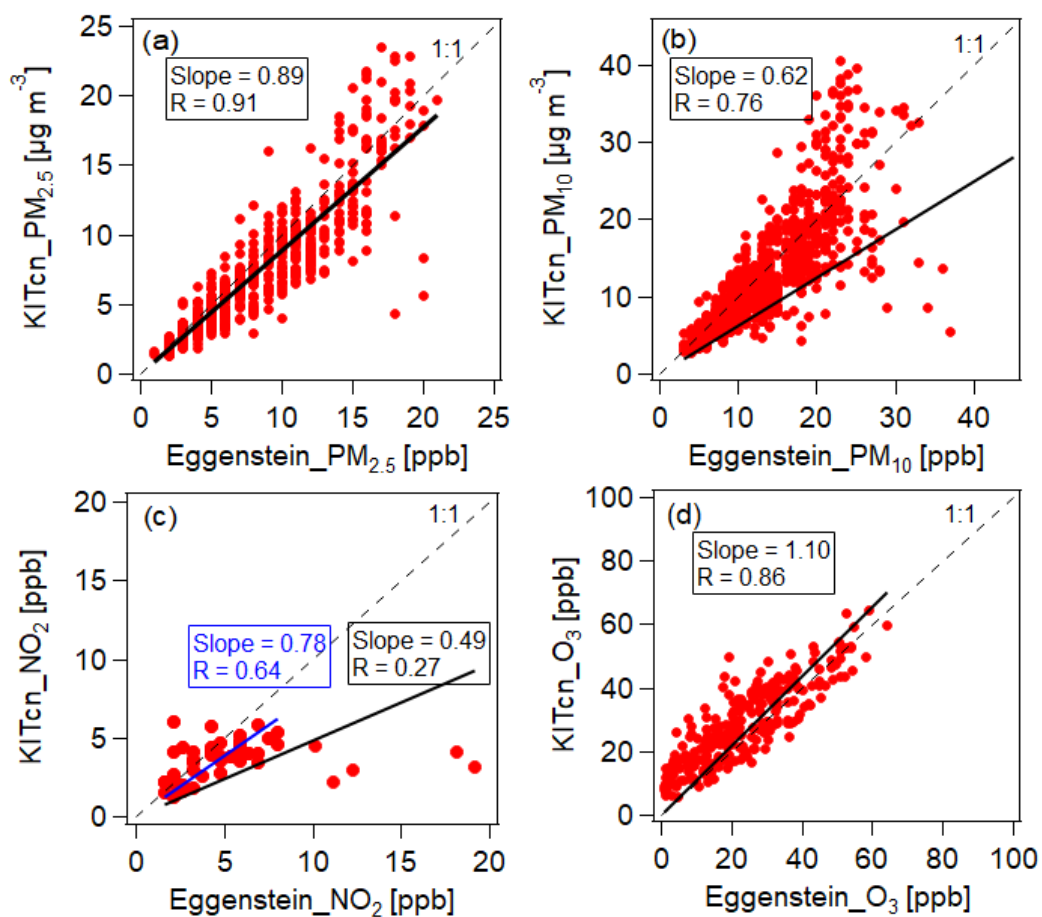

**Figure S3.** Scatter plots for (a)  $\text{PM}_{2.5}$ , (b)  $\text{PM}_{10}$ , (c)  $\text{NO}_2$  and (d)  $\text{O}_3$  measured at the sampling site (KITcn) and Eggenstein air quality monitor station during the measurement period. The black solid and dash lines represent the linear fit curve and 1:1 line, respectively. The blue solid line in (c) shows the linear fit curve after removing high  $\text{NO}_2$  values (>10 ppb) observed at Eggenstein monitor station.

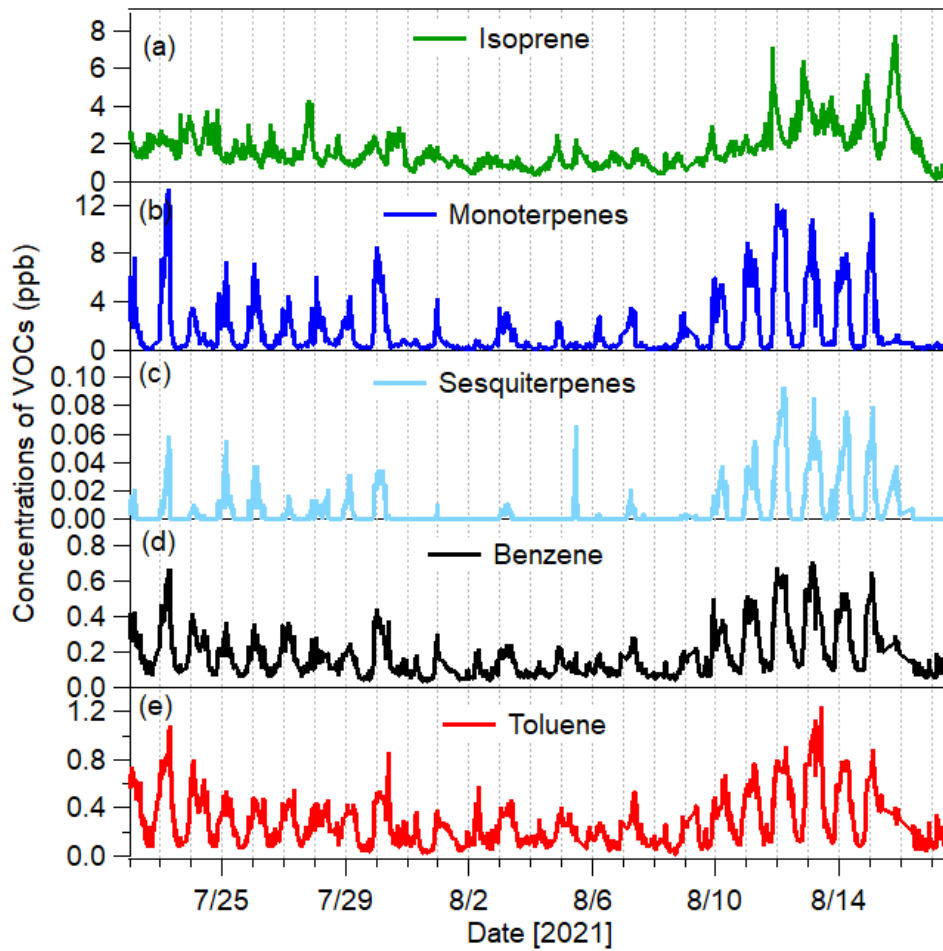

**Figure S4.** Time series of concentrations of selected VOC species. (a) isoprene; (b) monoterpenes; (c) sesquiterpenes; (d) benzene and (e) toluene.

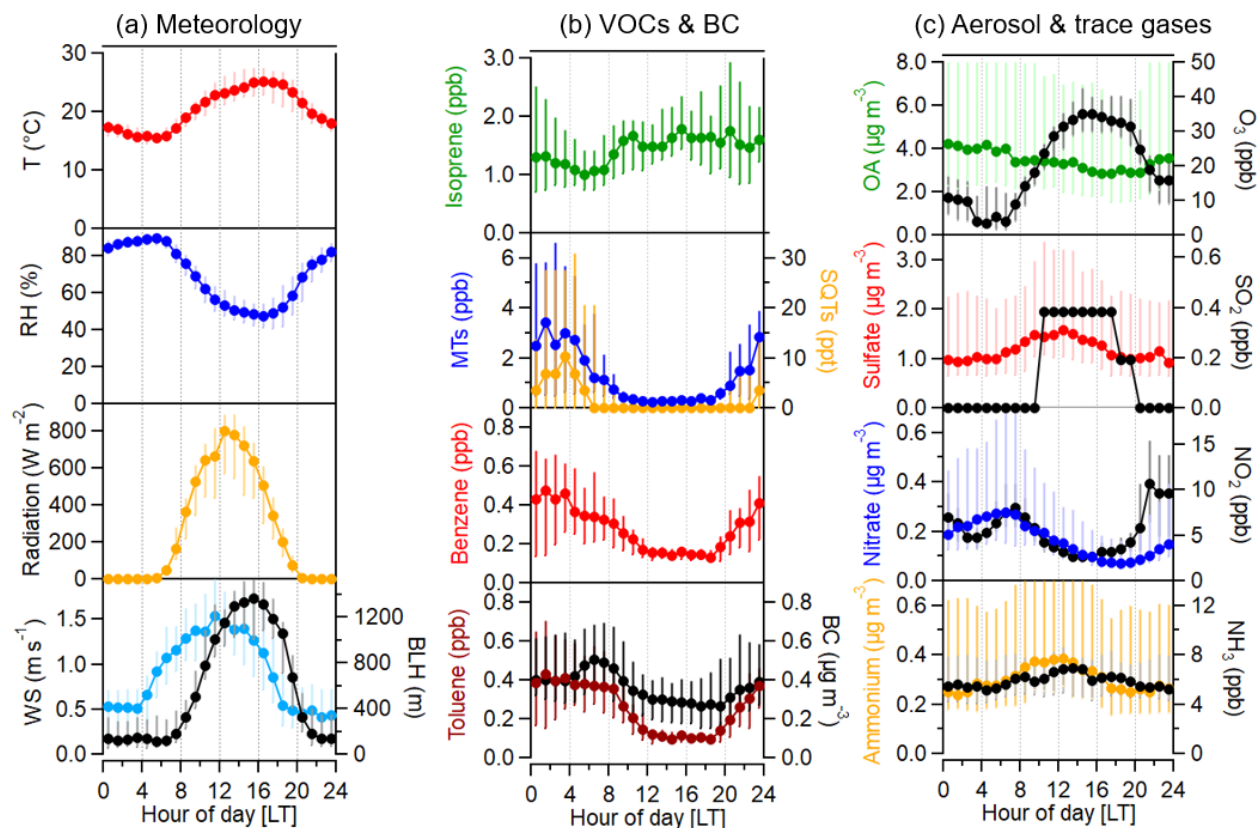

**Figure S5.** Diurnal variations of (a) meteorological parameters including temperature (T), relative humidity (RH), radiation, wind speeds (WS) and boundary layer height (BLH); (b) BC and VOCs including isoprene, monoterpenes (MTs), sesquiterpenes (SQTs), benzene, toluene; (c) aerosol species and trace gases including OA, sulfate, nitrate, ammonium, O<sub>3</sub>, SO<sub>2</sub>, NO<sub>2</sub> and NH<sub>3</sub> during the entire campaign. All data are shown in medians with the whiskers of 25<sup>th</sup> and 75<sup>th</sup> percentiles.



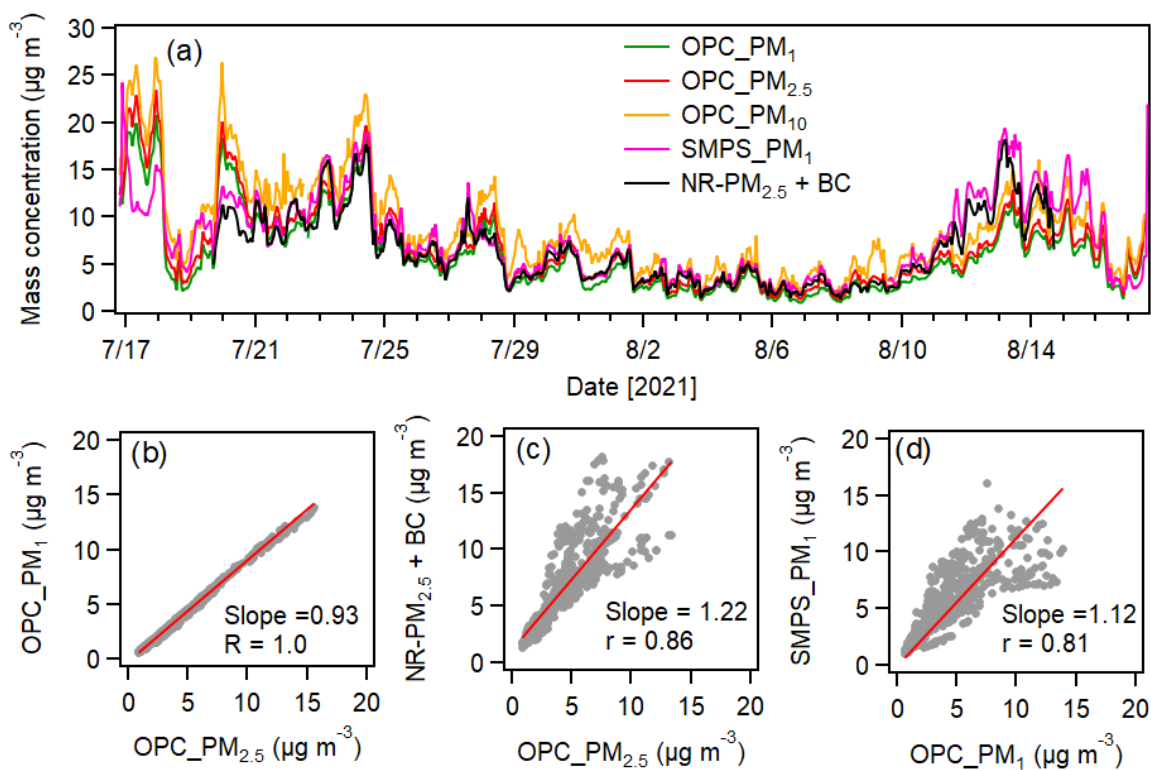

**Figure S6.** (a) Time series of PM<sub>1</sub>, PM<sub>2.5</sub>, PM<sub>10</sub> measured by the OPC, PM<sub>1</sub> calculated from SMPS measurement (assumed density of 1.4 g cm<sup>-3</sup>), and NR-PM<sub>2.5</sub> measured by the AMS plus BC measured by the AE33. (c-d) scatter plots between OPC\_PM<sub>1</sub> vs. OPC\_PM<sub>2.5</sub>, OPC\_PM<sub>2.5</sub> vs. NR-PM<sub>2.5</sub> plus BC, OPC\_PM<sub>1</sub> vs. SMPS\_PM<sub>1</sub> during the entire measurement period.

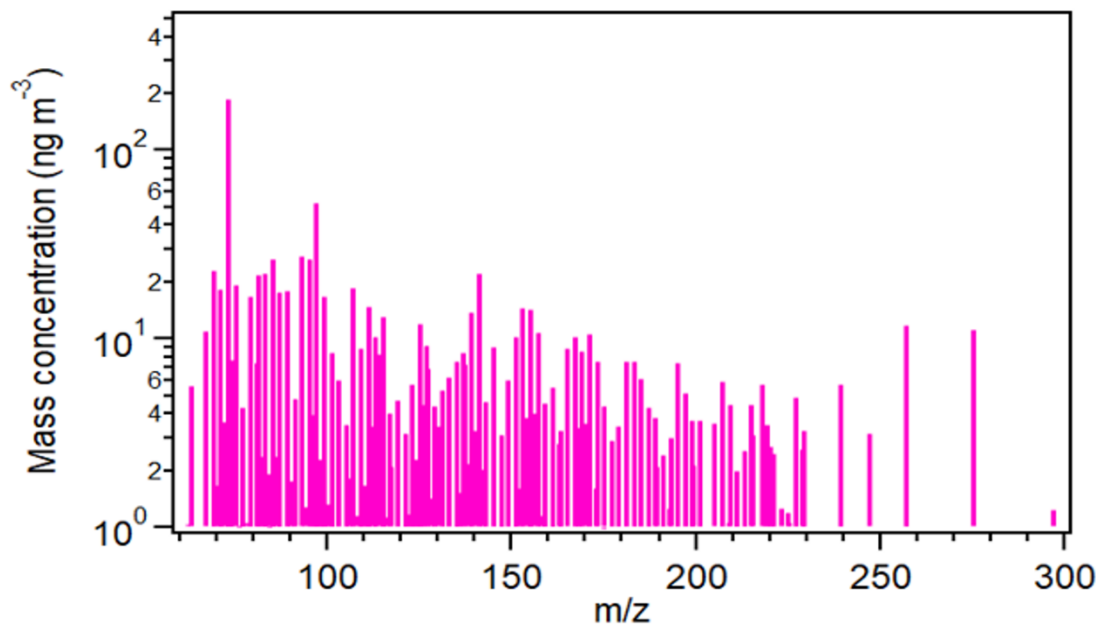

**Figure S7.** Median mass spectra of OA measured by the CHARON-PTR-MS

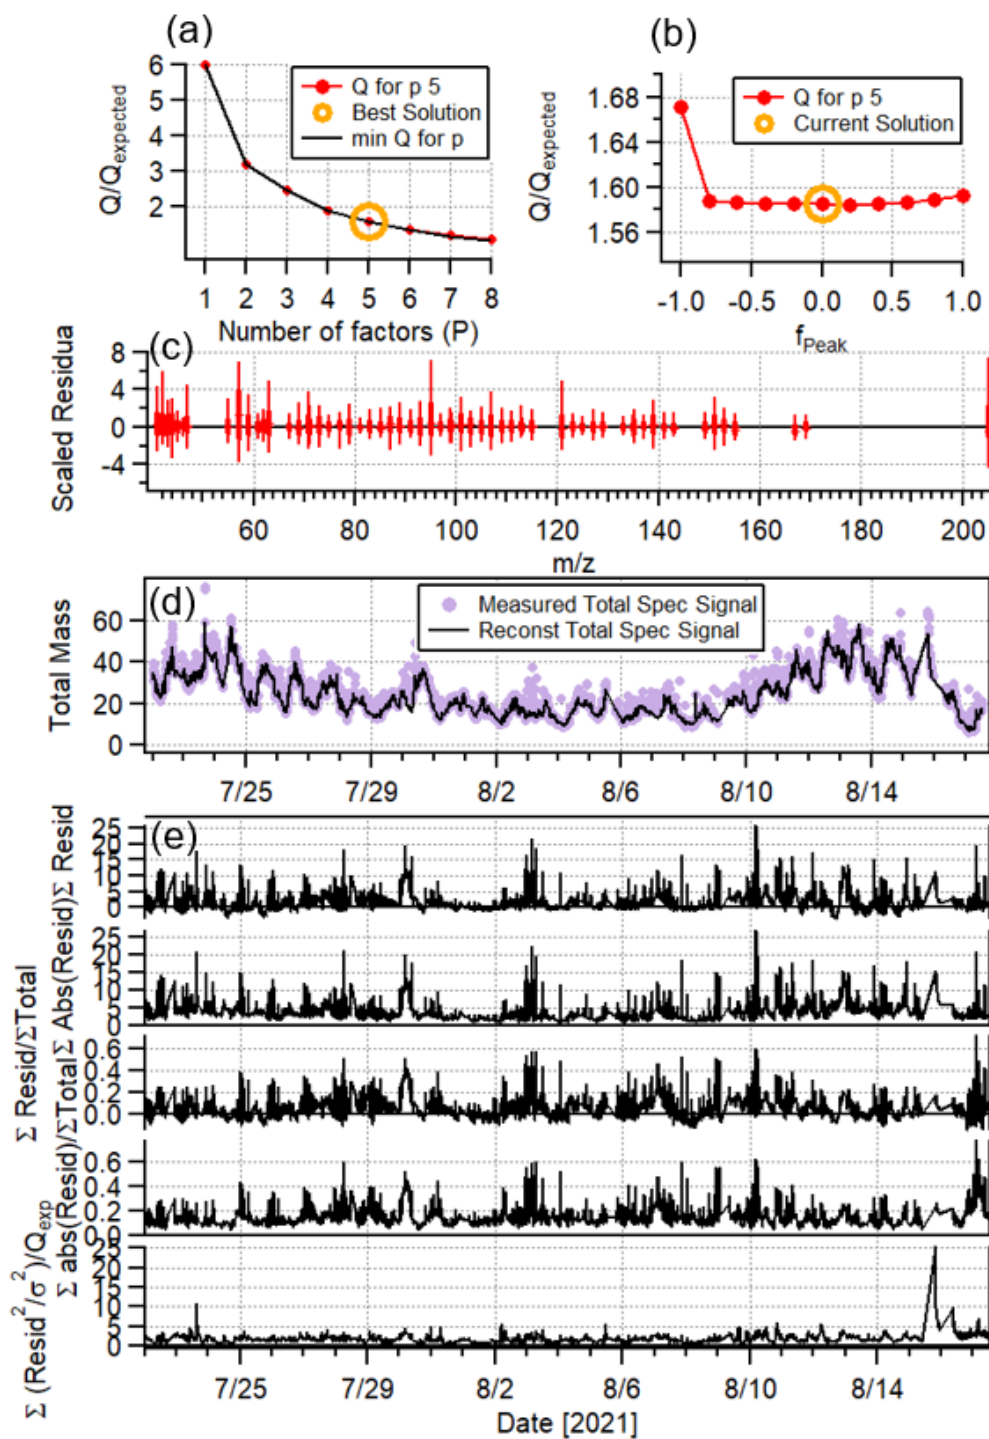

**Figure S8.** Key diagnostic plots for 5-factor PMF solution of PTR-measured VOCs: (a)  $Q/Q_{\text{expected}}$  as a function of number of factors (P); (b)  $Q/Q_{\text{expected}}$  as a function of  $f_{\text{Peak}}$ ; (c) the box and whiskers plot showing the distributions of scaled residuals for each  $m/z$ ; (d) time series of the measured organic mass and the reconstructed organic mass and (e) time series of variations of the residual values (= measured-reconstructed) of the fit.

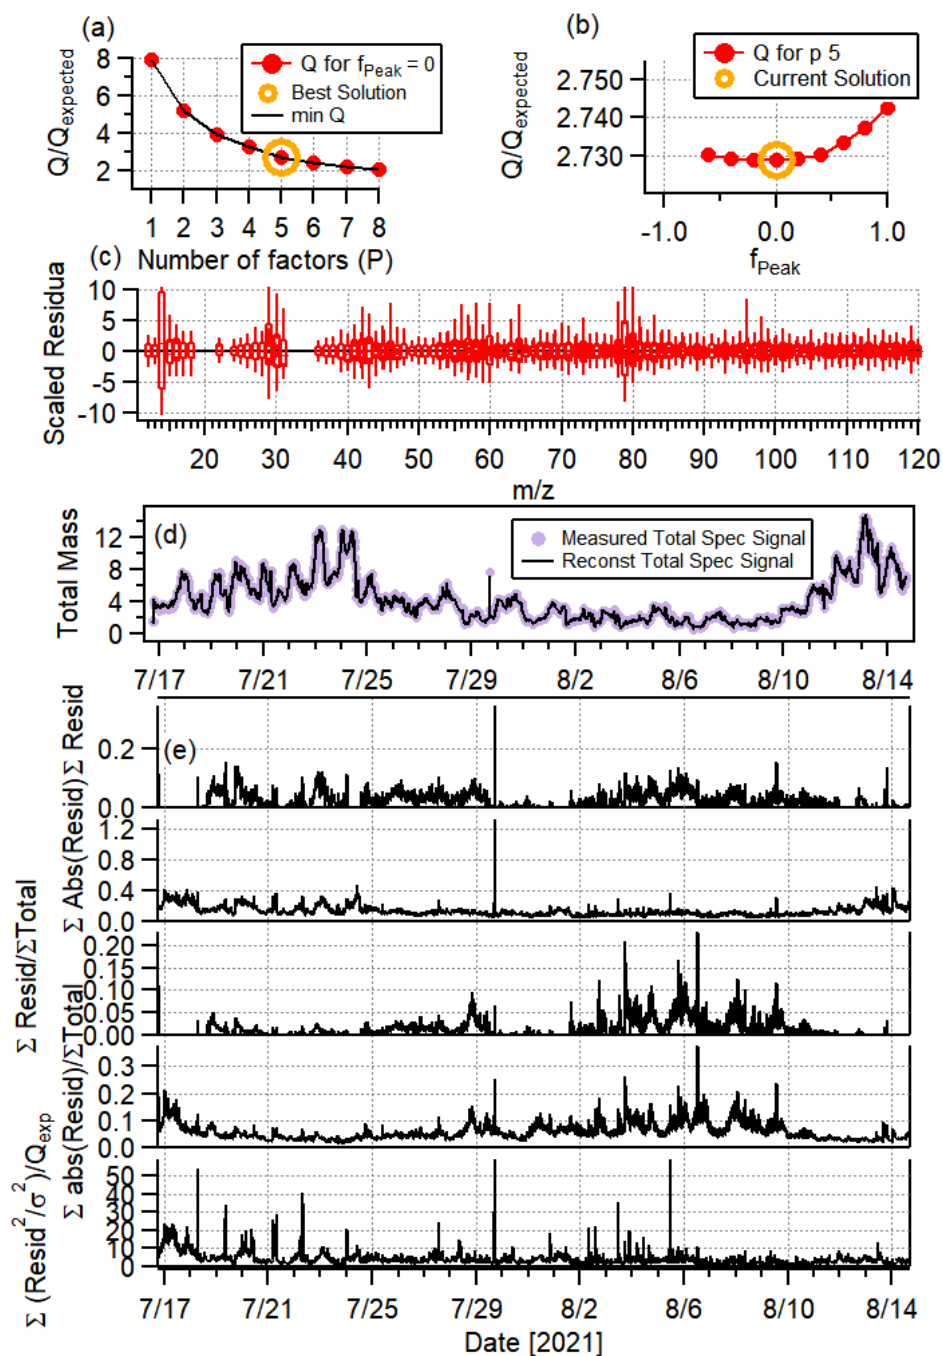

**Figure S9.** Key diagnostic plots for 5-factor PMF solution of AMS-measured OA: (a)  $Q/Q_{\text{expected}}$  as a function of number of factors (P); (b)  $Q/Q_{\text{expected}}$  as a function of  $f_{\text{Peak}}$ ; (c) the box and whiskers plot showing the distributions of scaled residuals for each  $m/z$ ; (d) time series of the measured organic mass and the reconstructed organic mass and (e) time series of variations of the residual values (= measured-reconstructed) of the fit.

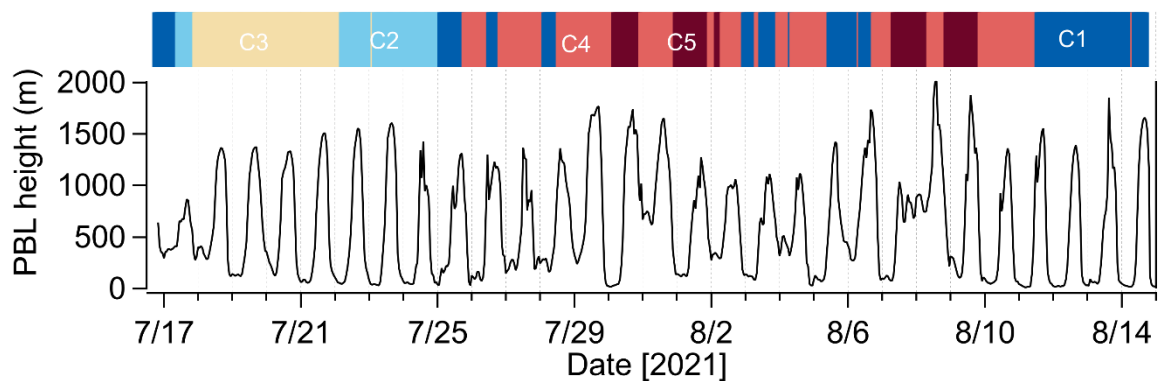

**Figure S10.** Time series of planetary boundary layer (PBL) height obtained from ERA5 reanalysis data over the entire campaign. The top shows the origins of five air mass clusters.

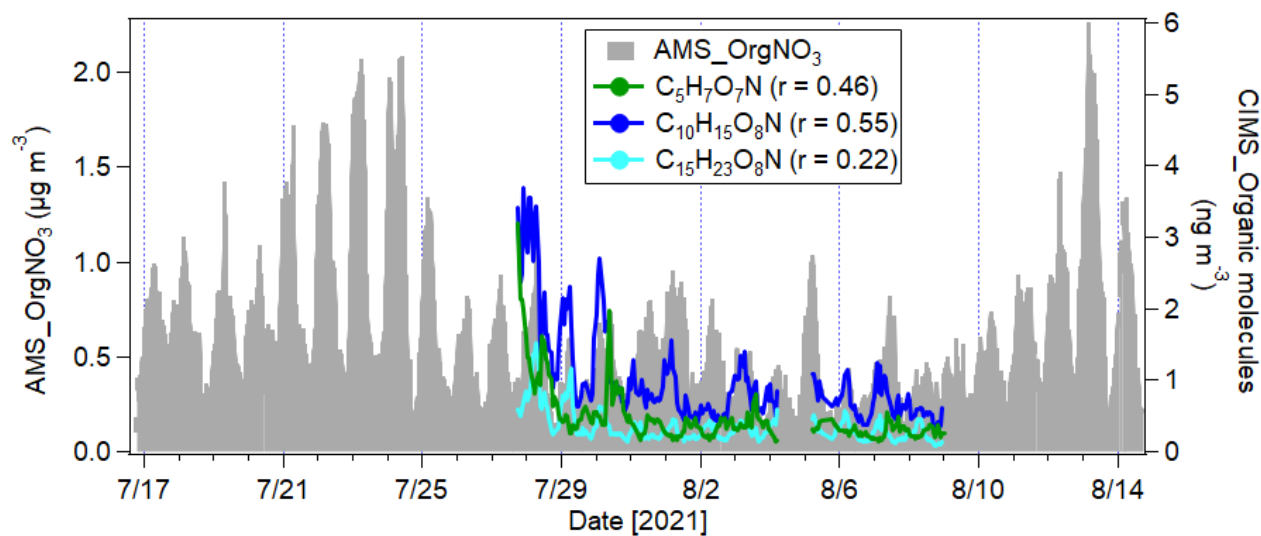

**Figure S11.** Time series of organic nitrate calculated from the AMS based on the method of  $\text{NO}_2^+/\text{NO}^+$  and three organic nitrate molecules ( $\text{C}_5\text{H}_7\text{O}_7\text{N}$ ,  $\text{C}_{10}\text{H}_{15}\text{O}_8\text{N}$  and  $\text{C}_{15}\text{H}_{23}\text{O}_8\text{N}$ ) detected by FIGAERO-CIMS related with the oxidation of isoprene, monoterpenes, sesquiterpenes respectively.

**Table S1** Instruments installed in the measurement room.

| Measured parameters                                         | Instrument                            | Data period |           |
|-------------------------------------------------------------|---------------------------------------|-------------|-----------|
|                                                             |                                       | Starting    | Ending    |
| Meteorological parameters                                   | WS700 (Lufft GmbH)                    | 7/16/2021   | 8/17/2021 |
| NO <sub>2</sub> (data missing)                              | AS32M (Environment SA)                | 7/16/2021   | 8/17/2021 |
| O <sub>3</sub> (data missing)                               | O341M (Environment SA)                | 7/16/2021   | 8/17/2021 |
| NH <sub>3</sub>                                             | G2103 (Picarro Inc.)                  | 7/16/2021   | 8/17/2021 |
| PM <sub>1</sub> , PM <sub>2.5</sub> , PM <sub>10</sub> mass | OPC FIDAS200 (Palas GmbH)             | 7/16/2021   | 8/17/2021 |
| Particle size (10–410 nm, $d_m$ )                           | NanoScan-SMPS3910 (TSI Inc.)          | 7/16/2021   | 8/17/2021 |
| Particle size (13.6-763.5 nm, $d_m$ )                       | SMPS (TSI Inc.)                       | 7/16/2021   | 8/17/2021 |
| Particle number concentration                               | CPC3789 (TSI Inc.)                    | 7/23/2021   | 8/17/2021 |
| Black carbon                                                | AE33 (Magee Scientific)               | 7/19/2021   | 8/17/2021 |
| Particle mass concentration                                 | AMS (Aerodyne Research Inc.)          | 7/16/2021   | 8/14/2021 |
| VOCs/oxygenated VOCs                                        | CHARON-PTR-MS (Ionicon Analytik GmbH) | 7/23/2021   | 8/17/2021 |
| Semi-volatile aerosol particles                             | CHARON-PTR-MS (Ionicon Analytik GmbH) | 7/23/2021   | 8/17/2021 |
| Oxygenated organic molecules                                | FIGAERO-CIMS (Aerodyne Research Inc.) | 7/27/2021   | 8/09/2021 |

**Table S2** List of VOC ions and average mixing ratios with standard deviation (Std) as well as measurement detection limit (MDL) included in the PMF analysis.

| m/z   | Formula                                                   | Tentative assignment               | Ave (ppb) | Std (ppb) | MDL (ppb) |
|-------|-----------------------------------------------------------|------------------------------------|-----------|-----------|-----------|
| 41.04 | C <sub>3</sub> H <sub>5</sub> <sup>+</sup>                | alkyl fragment                     | 3.078     | 1.752     | 0.1505    |
| 42.03 | C <sub>2</sub> H <sub>4</sub> N <sup>+</sup>              | acetonitrile                       | 0.361     | 0.413     | 0.0117    |
| 43.02 | C <sub>2</sub> H <sub>3</sub> O <sup>+</sup>              | acetic acid fragment               | 5.791     | 3.718     | 0.2686    |
| 43.05 | C <sub>3</sub> H <sub>7</sub> <sup>+</sup>                | propene + fragment                 | 0.402     | 0.251     | 0.0414    |
| 44.01 | CH <sub>2</sub> NO <sup>+</sup>                           | isocyanic acid                     | 0.140     | 0.085     | 0.0103    |
| 44.05 | C <sub>2</sub> H <sub>5</sub> N <sup>+</sup>              | formamide                          | 0.096     | 0.042     | 0.0082    |
| 45.03 | C <sub>2</sub> H <sub>5</sub> O <sup>+</sup>              | acetaldehyde                       | 1.754     | 0.951     | 0.1282    |
| 46.03 | CH <sub>4</sub> NO <sup>+</sup>                           | formamide                          | 0.067     | 0.028     | 0.0054    |
| 47.01 | CH <sub>3</sub> O <sub>2</sub> <sup>+</sup>               | formic acid                        | 1.011     | 0.732     | 0.0516    |
| 47.05 | C <sub>2</sub> H <sub>7</sub> O <sup>+</sup>              | ethanol                            | 0.071     | 0.117     | 0.0006    |
| 55.02 | C <sub>3</sub> H <sub>3</sub> O <sup>+</sup>              | fragment                           | 0.084     | 0.053     | 0.0066    |
| 55.05 | C <sub>4</sub> H <sub>7</sub> H <sup>+</sup>              | fragment                           | 0.649     | 0.299     | 0.0642    |
| 57.03 | C <sub>3</sub> H <sub>5</sub> O <sup>+</sup>              | acrolein                           | 0.322     | 0.335     | 0.0177    |
| 57.07 | C <sub>4</sub> H <sub>9</sub> <sup>+</sup>                | fragment                           | 0.629     | 0.712     | 0.0331    |
| 59.05 | C <sub>3</sub> H <sub>7</sub> O <sup>+</sup>              | acetone                            | 3.828     | 1.621     | 0.1250    |
| 61.03 | C <sub>2</sub> H <sub>5</sub> O <sub>2</sub> <sup>+</sup> | acetic acid                        | 1.258     | 0.819     | 0.0547    |
| 62.02 | CH <sub>4</sub> NO <sub>2</sub> <sup>+</sup>              | nitromethane                       | 0.035     | 0.018     | 0.0017    |
| 63.03 | C <sub>2</sub> H <sub>7</sub> S <sup>+</sup>              | dimethyl sulfide                   | 0.035     | 0.018     | 0.0015    |
| 63.04 | C <sub>2</sub> H <sub>7</sub> O <sub>2</sub> <sup>+</sup> | ethylene glycol                    | 0.014     | 0.007     | 0.0014    |
| 67.05 | C <sub>5</sub> H <sub>7</sub> H <sup>+</sup>              | fragment                           | 0.166     | 0.093     | 0.0131    |
| 69.03 | C <sub>4</sub> H <sub>5</sub> O <sup>+</sup>              | furan                              | 0.084     | 0.038     | 0.0055    |
| 69.07 | C <sub>5</sub> H <sub>9</sub> <sup>+</sup>                | Isoprene                           | 0.242     | 0.144     | 0.0280    |
| 71.01 | C <sub>3</sub> H <sub>3</sub> O <sub>2</sub> <sup>+</sup> | unknown                            | 0.060     | 0.027     | 0.0037    |
| 71.05 | C <sub>4</sub> H <sub>7</sub> O <sup>+</sup>              | methyl vinyl ketone + methacrolein | 0.204     | 0.134     | 0.0092    |
| 71.09 | C <sub>5</sub> H <sub>11</sub> <sup>+</sup>               | pentenes                           | 0.044     | 0.020     | 0.0095    |
| 73.03 | C <sub>3</sub> H <sub>5</sub> O <sub>2</sub> <sup>+</sup> | methylglyoxal/acrylic acid         | 0.171     | 0.063     | 0.0197    |
| 73.06 | C <sub>4</sub> H <sub>9</sub> O <sup>+</sup>              | methyl ethyl ketone/butanals       | 0.152     | 0.085     | 0.0052    |
| 75.04 | C <sub>3</sub> H <sub>7</sub> O <sub>2</sub> <sup>+</sup> | propanonic acid/hydroxyacetone     | 0.181     | 0.120     | 0.0091    |
| 77.02 | C <sub>2</sub> H <sub>5</sub> O <sub>3</sub> <sup>+</sup> | glycolic acid                      | 0.038     | 0.015     | 0.0046    |
| 79.05 | C <sub>6</sub> H <sub>7</sub> <sup>+</sup>                | benzene                            | 0.303     | 0.227     | 0.0123    |
| 81.07 | C <sub>6</sub> H <sub>9</sub> <sup>+</sup>                | fragment of monoterpenes           | 1.060     | 1.420     | 0.0192    |
| 83.05 | C <sub>5</sub> H <sub>7</sub> O <sup>+</sup>              | methylfuran                        | 0.163     | 0.092     | 0.0080    |
| 83.09 | C <sub>6</sub> H <sub>11</sub> <sup>+</sup>               | fragments of hexenol/hexanal       | 0.058     | 0.036     | 0.0110    |
| 85.03 | C <sub>4</sub> H <sub>5</sub> O <sub>2</sub> <sup>+</sup> | furanone                           | 0.096     | 0.054     | 0.0059    |
| 85.06 | C <sub>5</sub> H <sub>9</sub> O <sup>+</sup>              | cyclopentanone                     | 0.066     | 0.039     | 0.0037    |
| 85.10 | C <sub>6</sub> H <sub>13</sub> <sup>+</sup>               | methylcyclopentane                 | 0.014     | 0.008     | 0.0042    |
| 87.04 | C <sub>4</sub> H <sub>7</sub> O <sub>2</sub> <sup>+</sup> | 2,3-butanedione                    | 0.158     | 0.082     | 0.0099    |
| 87.08 | C <sub>5</sub> H <sub>11</sub> O <sup>+</sup>             | 2-pentanone                        | 0.015     | 0.009     | 0.0008    |
| 89.02 | C <sub>3</sub> H <sub>5</sub> O <sub>3</sub> <sup>+</sup> | butyric acid                       | 0.014     | 0.005     | 0.0008    |
| 89.06 | C <sub>4</sub> H <sub>9</sub> O <sub>2</sub> <sup>+</sup> | methyl propanoate                  | 0.016     | 0.012     | 0.0036    |
| 91.05 | C <sub>7</sub> H <sub>7</sub> <sup>+</sup>                | unknown                            | 0.102     | 0.081     | 0.0063    |

|        |                                                            |                                                 |       |       |        |
|--------|------------------------------------------------------------|-------------------------------------------------|-------|-------|--------|
| 93.07  | C <sub>7</sub> H <sub>9</sub> <sup>+</sup>                 | toluene                                         | 0.282 | 0.219 | 0.0126 |
| 95.01  | C <sub>5</sub> H <sub>3</sub> O <sub>2</sub> <sup>+</sup>  | unknown                                         | 0.041 | 0.053 | 0.0016 |
| 95.05  | C <sub>6</sub> H <sub>7</sub> O <sup>+</sup>               | phenol                                          | 0.170 | 0.047 | 0.0092 |
| 95.09  | C <sub>7</sub> H <sub>11</sub> <sup>+</sup>                | fragment of monoterpenes                        | 0.226 | 0.243 | 0.0107 |
| 97.03  | C <sub>5</sub> H <sub>5</sub> O <sub>2</sub> <sup>+</sup>  | furfural                                        | 0.023 | 0.011 | 0.0024 |
| 97.06  | C <sub>6</sub> H <sub>9</sub> O <sup>+</sup>               | 2-ethylfuran/2,5-dimethylfuran                  | 0.116 | 0.072 | 0.0054 |
| 97.10  | C <sub>7</sub> H <sub>13</sub> <sup>+</sup>                | methylcyclohexene                               | 0.018 | 0.017 | 0.0068 |
| 99.01  | C <sub>4</sub> H <sub>3</sub> O <sub>3</sub> <sup>+</sup>  | unknown                                         | 0.028 | 0.017 | 0.0032 |
| 99.04  | C <sub>5</sub> H <sub>7</sub> O <sub>2</sub> <sup>+</sup>  | furanone                                        | 0.082 | 0.050 | 0.0045 |
| 99.08  | C <sub>6</sub> H <sub>11</sub> O <sup>+</sup>              | cyclohexanone                                   | 0.019 | 0.011 | 0.0011 |
| 101.02 | C <sub>4</sub> H <sub>5</sub> O <sub>3</sub> <sup>+</sup>  | pentanedione                                    | 0.023 | 0.012 | 0.0019 |
| 101.06 | C <sub>5</sub> H <sub>9</sub> O <sub>2</sub> <sup>+</sup>  | C5-hydroxycarbonyl (ISOPOOH conversion product) | 0.182 | 0.139 | 0.0083 |
| 103.04 | C <sub>4</sub> H <sub>7</sub> O <sub>3</sub> <sup>+</sup>  | acetic anhydride                                | 0.012 | 0.007 | 0.0013 |
| 105.07 | C <sub>8</sub> H <sub>9</sub> <sup>+</sup>                 | styrene                                         | 0.033 | 0.028 | 0.0031 |
| 107.09 | C <sub>8</sub> H <sub>11</sub> <sup>+</sup>                | C <sub>8</sub> aromatics (xylenes)              | 0.195 | 0.145 | 0.0062 |
| 109.03 | C <sub>6</sub> H <sub>5</sub> O <sub>2</sub> <sup>+</sup>  | unknown                                         | 0.012 | 0.008 | 0.0023 |
| 109.06 | C <sub>7</sub> H <sub>9</sub> O <sup>+</sup>               | cresol/benzylalcohol                            | 0.053 | 0.029 | 0.0020 |
| 109.10 | C <sub>8</sub> H <sub>13</sub> <sup>+</sup>                | fragment of sesquiterpenes                      | 0.067 | 0.048 | 0.0063 |
| 111.04 | C <sub>6</sub> H <sub>7</sub> O <sub>2</sub> <sup>+</sup>  |                                                 | 0.056 | 0.034 | 0.0033 |
| 111.08 | C <sub>7</sub> H <sub>11</sub> O <sup>+</sup>              | heptadienal                                     | 0.048 | 0.029 | 0.0025 |
| 113.02 | C <sub>5</sub> H <sub>5</sub> O <sub>3</sub> <sup>+</sup>  | furoic acid                                     | 0.031 | 0.020 | 0.0019 |
| 113.06 | C <sub>6</sub> H <sub>9</sub> O <sub>2</sub> <sup>+</sup>  | hexendione                                      | 0.041 | 0.026 | 0.0019 |
| 115.04 | C <sub>5</sub> H <sub>7</sub> O <sub>3</sub> <sup>+</sup>  | pentanetriene                                   | 0.016 | 0.008 | 0.0011 |
| 115.08 | C <sub>6</sub> H <sub>11</sub> O <sub>2</sub> <sup>+</sup> | 2,5-hexanedione/ethyl-2-butenolate              | 0.042 | 0.030 | 0.0025 |
| 121.10 | C <sub>9</sub> H <sub>13</sub> <sup>+</sup>                | C <sub>9</sub> aromatics (trimethylbenzene)     | 0.084 | 0.068 | 0.0037 |
| 123.08 | C <sub>8</sub> H <sub>11</sub> O <sup>+</sup>              | unknown                                         | 0.022 | 0.014 | 0.0013 |
| 123.12 | C <sub>9</sub> H <sub>15</sub> <sup>+</sup>                | fragment of sesquiterpenes                      | 0.034 | 0.028 | 0.0032 |
| 125.06 | C <sub>7</sub> H <sub>9</sub> O <sub>2</sub> <sup>+</sup>  | guaiacol + dihydroxy toluene                    | 0.024 | 0.015 | 0.0018 |
| 125.10 | C <sub>8</sub> H <sub>13</sub> O <sup>+</sup>              | unknown                                         | 0.026 | 0.016 | 0.0019 |
| 127.04 | C <sub>6</sub> H <sub>7</sub> O <sub>3</sub> <sup>+</sup>  | unknown                                         | 0.015 | 0.009 | 0.0018 |
| 127.08 | C <sub>7</sub> H <sub>11</sub> O <sub>2</sub> <sup>+</sup> | unknown                                         | 0.023 | 0.015 | 0.0004 |
| 127.11 | C <sub>8</sub> H <sub>15</sub> O <sup>+</sup>              | E-2-octenal                                     | 0.003 | 0.002 | 0.0008 |
| 129.05 | C <sub>6</sub> H <sub>9</sub> O <sub>3</sub> <sup>+</sup>  | unknown                                         | 0.008 | 0.006 | 0.0016 |
| 129.09 | C <sub>7</sub> H <sub>13</sub> O <sub>2</sub> <sup>+</sup> | unknown                                         | 0.016 | 0.010 | 0.0016 |
| 133.10 | C <sub>10</sub> H <sub>13</sub> <sup>+</sup>               | cymenene                                        | 0.014 | 0.013 | 0.0029 |
| 135.08 | C <sub>9</sub> H <sub>11</sub> O <sup>+</sup>              | unknown                                         | 0.006 | 0.006 | 0.0018 |
| 135.12 | C <sub>10</sub> H <sub>15</sub> <sup>+</sup>               | C <sub>10</sub> aromatics/p-cymene              | 0.038 | 0.036 | 0.0018 |
| 137.13 | C <sub>10</sub> H <sub>17</sub> <sup>+</sup>               | monoterpenes                                    | 0.393 | 0.570 | 0.0035 |
| 139.08 | C <sub>8</sub> H <sub>11</sub> O <sub>2</sub> <sup>+</sup> | unknown                                         | 0.021 | 0.014 | 0.0016 |
| 139.11 | C <sub>9</sub> H <sub>15</sub> O <sup>+</sup>              | nopinone                                        | 0.023 | 0.018 | 0.0009 |
| 141.05 | C <sub>7</sub> H <sub>9</sub> O <sub>3</sub> <sup>+</sup>  | dicarbonyl epoxide                              | 0.020 | 0.015 | 0.0033 |
| 141.09 | C <sub>8</sub> H <sub>13</sub> O <sub>2</sub> <sup>+</sup> | unknown                                         | 0.018 | 0.012 | 0.0013 |
| 143.07 | C <sub>7</sub> H <sub>11</sub> O <sub>3</sub> <sup>+</sup> | unknown                                         | 0.006 | 0.005 | 0.0021 |
| 143.11 | C <sub>8</sub> H <sub>15</sub> O <sub>2</sub> <sup>+</sup> | Z-3-hexenyl acetate                             | 0.008 | 0.005 | 0.0015 |
| 149.10 | C <sub>10</sub> H <sub>13</sub> O <sup>+</sup>             | unknown                                         | 0.006 | 0.006 | 0.0010 |



|        |                                                             |                                                |       |       |        |
|--------|-------------------------------------------------------------|------------------------------------------------|-------|-------|--------|
| 149.13 | C <sub>11</sub> H <sub>17</sub> <sup>+</sup>                | fragment of sesquiterpene                      | 0.004 | 0.003 | 0.0010 |
| 151.11 | C <sub>10</sub> H <sub>15</sub> O <sup>+</sup>              | fragment of pinonaldehyde                      | 0.027 | 0.026 | 0.0012 |
| 151.08 | C <sub>9</sub> H <sub>11</sub> O <sub>2</sub> <sup>+</sup>  | methylsalicylate                               | 0.009 | 0.007 | 0.0015 |
| 153.09 | C <sub>9</sub> H <sub>13</sub> O <sub>2</sub> <sup>+</sup>  | unknown                                        | 0.008 | 0.005 | 0.0008 |
| 153.13 | C <sub>10</sub> H <sub>17</sub> O <sup>+</sup>              | camphor                                        | 0.013 | 0.013 | 0.0007 |
| 155.07 | C <sub>8</sub> H <sub>11</sub> O <sub>3</sub> <sup>+</sup>  | unknown                                        | 0.008 | 0.009 | 0.0024 |
| 155.11 | C <sub>9</sub> H <sub>15</sub> O <sub>2</sub> <sup>+</sup>  | arbusculone, C <sub>9</sub> unsaturated esters | 0.004 | 0.003 | 0.0006 |
| 167.07 | C <sub>9</sub> H <sub>11</sub> O <sub>3</sub> <sup>+</sup>  | unknown                                        | 0.007 | 0.007 | 0.0041 |
| 167.11 | C <sub>10</sub> H <sub>15</sub> O <sub>2</sub> <sup>+</sup> | unknown                                        | 0.004 | 0.004 | 0.0015 |
| 169.09 | C <sub>9</sub> H <sub>13</sub> O <sub>3</sub> <sup>+</sup>  | unknown                                        | 0.003 | 0.005 | 0.0029 |
| 169.12 | C <sub>10</sub> H <sub>17</sub> O <sub>2</sub> <sup>+</sup> | unknown                                        | 0.008 | 0.004 | 0.0007 |
| 205.20 | C <sub>15</sub> H <sub>25</sub> <sup>+</sup>                | sesquiterpenes                                 | 0.002 | 0.004 | 0.0001 |

**Table S3** List of organic ions in the particle phase measured by the CHARON included in the PMF analysis.

| m/z   | Formula                                                    | Ave (ng m <sup>-3</sup> ) | Std (ng m <sup>-3</sup> ) |
|-------|------------------------------------------------------------|---------------------------|---------------------------|
| 63.04 | C <sub>2</sub> H <sub>7</sub> O <sub>2</sub> <sup>+</sup>  | 7.0                       | 4.3                       |
| 65.02 | C <sub>1</sub> H <sub>5</sub> O <sub>3</sub> <sup>+</sup>  | 1.4                       | 2.2                       |
| 67.05 | C <sub>5</sub> H <sub>7</sub> <sup>+</sup>                 | 21.3                      | 28.0                      |
| 69.03 | C <sub>4</sub> H <sub>5</sub> O <sub>1</sub> <sup>+</sup>  | 19.2                      | 19.2                      |
| 69.07 | C <sub>5</sub> H <sub>9</sub> <sup>+</sup>                 | 29.1                      | 19.0                      |
| 71.05 | C <sub>4</sub> H <sub>7</sub> O <sub>1</sub> <sup>+</sup>  | 27.3                      | 25.4                      |
| 73.03 | C <sub>3</sub> H <sub>5</sub> O <sub>2</sub> <sup>+</sup>  | 185.7                     | 35.7                      |
| 73.07 | C <sub>4</sub> H <sub>9</sub> O <sub>1</sub> <sup>+</sup>  | 2.5                       | 2.3                       |
| 75.04 | C <sub>3</sub> H <sub>7</sub> O <sub>2</sub> <sup>+</sup>  | 22.3                      | 11.2                      |
| 77.04 | C <sub>6</sub> H <sub>5</sub> <sup>+</sup>                 | 7.9                       | 6.5                       |
| 79.05 | C <sub>6</sub> H <sub>7</sub> <sup>+</sup>                 | 20.3                      | 19.6                      |
| 81.07 | C <sub>6</sub> H <sub>9</sub> <sup>+</sup>                 | 34.3                      | 34.6                      |
| 83.05 | C <sub>5</sub> H <sub>7</sub> O <sub>1</sub> <sup>+</sup>  | 34.9                      | 33.8                      |
| 83.08 | C <sub>6</sub> H <sub>11</sub> <sup>+</sup>                | 16.2                      | 6.7                       |
| 85.03 | C <sub>4</sub> H <sub>5</sub> O <sub>2</sub> <sup>+</sup>  | 47.0                      | 49.7                      |
| 85.07 | C <sub>5</sub> H <sub>9</sub> O <sub>1</sub> <sup>+</sup>  | 7.7                       | 6.9                       |
| 87.04 | C <sub>4</sub> H <sub>7</sub> O <sub>2</sub> <sup>+</sup>  | 22.3                      | 14.8                      |
| 87.08 | C <sub>5</sub> H <sub>11</sub> O <sub>1</sub> <sup>+</sup> | 1.6                       | 0.6                       |
| 89.02 | C <sub>3</sub> H <sub>5</sub> O <sub>3</sub> <sup>+</sup>  | 3.0                       | 3.3                       |
| 89.06 | C <sub>4</sub> H <sub>9</sub> O <sub>2</sub> <sup>+</sup>  | 21.3                      | 10.9                      |
| 91.05 | C <sub>7</sub> H <sub>7</sub> <sup>+</sup>                 | 7.9                       | 8.5                       |

|        |                  |      |      |
|--------|------------------|------|------|
| 93.03  | $C_6H_5O_1^+$    | 0.9  | 2.4  |
| 93.07  | $C_7H_9^+$       | 38.7 | 33.0 |
| 95.04  | $C_6H_7O_1^+$    | 39.3 | 37.7 |
| 95.08  | $C_7H_{11}^+$    | 20.4 | 23.1 |
| 97.03  | $C_5H_5O_2^+$    | 20.0 | 19.4 |
| 97.06  | $C_6H_9O_1$      | 19.5 | 22.7 |
| 97.10  | $C_7H_{13}^+$    | 8.3  | 2.7  |
| 99.04  | $C_5H_7O_2^+$    | 29.4 | 31.6 |
| 99.08  | $C_6H_{11}O_1^+$ | 4.5  | 4.3  |
| 99.12  | $C_7H_{15}^+$    | 0.4  | 0.4  |
| 101.06 | $C_5H_9O_2^+$    | 11.2 | 10.6 |
| 101.10 | $C_6H_{13}O_1^+$ | 1.5  | 0.6  |
| 103.04 | $C_4H_7O_3^+$    | 8.5  | 6.4  |
| 103.08 | $C_5H_{11}O_2^+$ | 0.9  | 0.5  |
| 105.07 | $C_8H_9^+$       | 5.7  | 6.1  |
| 107.05 | $C_7H_7O_1^+$    | 4.8  | 2.3  |
| 107.08 | $C_8H_{11}^+$    | 34.1 | 42.0 |
| 109.07 | $C_7H_9O_1^+$    | 14.5 | 17.4 |
| 109.10 | $C_8H_{13}^+$    | 15.7 | 18.9 |
| 111.05 | $C_6H_7O_2^+$    | 26.2 | 27.0 |
| 111.08 | $C_7H_{11}O_1^+$ | 7.8  | 7.8  |
| 111.11 | $C_8H_{15}^+$    | 3.5  | 1.5  |
| 113.02 | $C_5H_5O_3^+$    | 8.6  | 8.1  |
| 113.06 | $C_6H_9O_2^+$    | 17.6 | 18.8 |
| 115.04 | $C_5H_7O_3^+$    | 9.5  | 9.2  |
| 115.08 | $C_6H_{11}O_2^+$ | 14.6 | 7.8  |
| 119.08 | $C_9H_{11}^+$    | 7.1  | 6.6  |
| 121.02 | $C_7H_5O_2^+$    | 2.1  | 1.8  |
| 121.07 | $C_8H_9O_1^+$    | 4.8  | 4.4  |
| 121.10 | $C_9H_{13}^+$    | 5.8  | 6.8  |
| 123.04 | $C_7H_7O_2^+$    | 8.3  | 7.9  |
| 123.08 | $C_8H_{11}O_1^+$ | 9.6  | 10.3 |
| 123.11 | $C_9H_{15}^+$    | 6.9  | 9.4  |
| 125.03 | $C_6H_5O_3^+$    | 4.7  | 4.7  |
| 125.06 | $C_7H_9O_2^+$    | 20.1 | 21.1 |
| 125.10 | $C_8H_{13}O_1^+$ | 4.9  | 5.1  |

|        |                     |      |      |
|--------|---------------------|------|------|
| 125.13 | $C_9H_{17}^+$       | 0.9  | 0.5  |
| 127.04 | $C_6H_7O_3^+$       | 15.0 | 13.8 |
| 127.07 | $C_7H_{11}O_2^+$    | 12.6 | 14.4 |
| 127.12 | $C_8H_{15}O_1^+$    | 0.9  | 0.5  |
| 129.02 | $C_5H_5O_4^+$       | 4.5  | 4.1  |
| 129.06 | $C_6H_9O_3^+$       | 7.6  | 7.6  |
| 129.09 | $C_7H_{13}O_2^+$    | 1.3  | 1.1  |
| 131.03 | $C_5H_7O_4^+$       | 6.5  | 4.2  |
| 131.07 | $C_6H_{11}O_3^+$    | 6.3  | 3.3  |
| 133.01 | $C_4H_5O_5^+$       | 0.9  | 0.7  |
| 133.05 | $C_5H_9O_4^+$       | 6.6  | 4.7  |
| 133.10 | $C_{10}H_{13}^+$    | 8.8  | 7.0  |
| 135.04 | $C_8H_7O_2^+$       | 3.7  | 3.4  |
| 135.08 | $C_9H_{11}O_1^+$    | 10.1 | 6.5  |
| 135.11 | $C_{10}H_{15}^+$    | 9.9  | 17.2 |
| 137.10 | $C_9H_{13}O_1^+$    | 10.9 | 10.4 |
| 137.13 | $C_{10}H_{17}^+$    | 0.2  | 0.3  |
| 139.04 | $C_7H_7O_3^+$       | 18.3 | 22.3 |
| 139.12 | $C_9H_{15}O_1^+$    | 0.9  | 0.9  |
| 141.06 | $C_7H_9O_3^+$       | 39.4 | 42.1 |
| 141.13 | $C_9H_{17}O_1^+$    | 0.5  | 0.7  |
| 143.03 | $C_6H_7O_4^+$       | 4.5  | 4.0  |
| 143.07 | $C_7H_{11}O_3^+$    | 8.1  | 7.9  |
| 143.11 | $C_8H_{15}O_2^+$    | 1.3  | 1.3  |
| 145.05 | $C_6H_9O_4^+$       | 16.3 | 16.1 |
| 147.08 | $C_{10}H_{11}O_1^+$ | 4.6  | 4.1  |
| 149.03 | $C_8H_5O_3^+$       | 1.5  | 1.7  |
| 149.06 | $C_9H_9O_2^+$       | 6.8  | 5.9  |
| 151.08 | $C_9H_{11}O_2^+$    | 15.1 | 12.3 |
| 151.11 | $C_{10}H_{15}O_1^+$ | 11.2 | 13.2 |
| 153.05 | $C_4H_9O_6^+$       | 9.2  | 9.6  |
| 153.09 | $C_9H_{13}O_2^+$    | 24.4 | 26.7 |
| 153.13 | $C_{10}H_{17}O_1^+$ | 2.0  | 4.3  |
| 155.07 | $C_8H_{11}O_3^+$    | 24.5 | 23.3 |
| 155.10 | $C_9H_{15}O_2^+$    | 0.8  | 1.5  |
| 157.05 | $C_7H_9O_4^+$       | 20.0 | 21.3 |

|        |                     |      |      |
|--------|---------------------|------|------|
| 159.06 | $C_7H_{11}O_4^+$    | 7.7  | 6.9  |
| 163.05 | $C_{13}H_7^+$       | 4.3  | 3.7  |
| 163.08 | $C_{10}H_{11}O_2^+$ | 5.2  | 5.2  |
| 163.13 | $C_8H_{19}O_3^+$    | 1.3  | 0.8  |
| 165.02 | $C_8H_5O_4^+$       | 1.1  | 0.9  |
| 165.09 | $C_{10}H_{13}O_2^+$ | 14.1 | 14.4 |
| 167.03 | $C_8H_7O_4^+$       | 0.8  | 0.9  |
| 167.07 | $C_9H_{11}O_3^+$    | 16.1 | 14.6 |
| 167.11 | $C_{10}H_{15}O_2^+$ | 6.0  | 7.2  |
| 169.05 | $C_8H_9O_4^+$       | 8.1  | 7.2  |
| 169.09 | $C_9H_{13}O_3^+$    | 15.0 | 16.5 |
| 171.07 | $C_8H_{11}O_4^+$    | 19.2 | 19.3 |
| 171.17 | $C_{11}H_{23}O_1^+$ | 2.0  | 1.1  |
| 173.04 | $C_7H_9O_5^+$       | 2.8  | 2.7  |
| 175.07 | $C_{11}H_{11}O_2^+$ | 6.7  | 5.7  |
| 177.05 | $C_6H_9O_6^+$       | 3.2  | 2.7  |
| 179.07 | $C_{10}H_{11}O_3^+$ | 4.8  | 3.7  |
| 179.09 | $C_{14}H_{11}^+$    | 4.4  | 3.4  |
| 181.09 | $C_{10}H_{13}O_3^+$ | 12.7 | 13.1 |
| 183.10 | $C_{10}H_{15}O_3^+$ | 10.1 | 11.2 |
| 183.17 | $C_{12}H_{23}O_1^+$ | 0.8  | 0.7  |
| 185.01 | $C_7H_5O_6^+$       | 0.9  | 0.7  |
| 185.08 | $C_9H_{13}O_4^+$    | 10.9 | 10.7 |
| 185.16 | $C_{11}H_{21}O_2^+$ | 1.8  | 0.7  |
| 187.06 | $C_8H_{11}O_5^+$    | 5.9  | 5.5  |
| 187.17 | $C_{11}H_{23}O_2^+$ | 0.5  | 0.3  |
| 189.06 | $C_{15}H_9^+$       | 5.9  | 5.1  |
| 191.05 | $C_7H_{11}O_6^+$    | 3.3  | 2.4  |
| 191.15 | $C_{13}H_{19}O_1^+$ | 1.8  | 1.4  |
| 193.07 | $C_7H_{13}O_6^+$    | 4.3  | 3.4  |
| 193.17 | $C_{13}H_{21}O_1^+$ | 1.2  | 1.1  |
| 195.12 | $C_8H_{19}O_5^+$    | 9.9  | 6.2  |
| 197.09 | $C_{10}H_{13}O_4^+$ | 9.0  | 8.9  |
| 197.19 | $C_{13}H_{25}O_1^+$ | 0.8  | 0.5  |
| 199.05 | $C_9H_{11}O_5^+$    | 3.2  | 2.6  |
| 199.09 | $C_{10}H_{15}O_4^+$ | 7.4  | 8.4  |

|        |                     |      |     |
|--------|---------------------|------|-----|
| 201.07 | $C_{16}H_9^+$       | 6.5  | 6.6 |
| 201.19 | $C_{12}H_{25}O_2^+$ | 4.0  | 1.9 |
| 205.12 | $C_{13}H_{17}O_2^+$ | 4.9  | 3.4 |
| 205.20 | $C_{15}H_{25}^+$    | 0.5  | 0.4 |
| 207.03 | $C_{10}H_7O_5^+$    | 1.9  | 1.6 |
| 207.15 | $C_{13}H_{19}O_2^+$ | 7.4  | 4.6 |
| 209.01 | $C_9H_5O_6^+$       | 1.4  | 1.0 |
| 211.09 | $C_7H_{15}O_7^+$    | 3.3  | 3.2 |
| 211.20 | $C_{14}H_{27}O_1^+$ | 1.6  | 0.8 |
| 213.08 | $C_{10}H_{13}O_5^+$ | 4.6  | 4.4 |
| 219.06 | $C_8H_{11}O_7^+$    | 2.1  | 1.5 |
| 219.18 | $C_{15}H_{23}O_1^+$ | 4.0  | 2.0 |
| 221.11 | $C_9H_{17}O_6^+$    | 3.3  | 2.5 |
| 223.07 | $C_{15}H_{11}O_2^+$ | 2.9  | 3.5 |
| 225.06 | $C_{14}H_9O_3^+$    | 2.2  | 2.4 |
| 225.22 | $C_{15}H_{29}O_1^+$ | 1.4  | 0.9 |
| 227.21 | $C_{14}H_{27}O_2^+$ | 5.2  | 1.8 |
| 229.10 | $C_{18}H_{13}^+$    | 2.9  | 2.5 |
| 229.22 | $C_{14}H_{29}O_2^+$ | 3.5  | 1.7 |
| 239.11 | $C_{16}H_{15}O_2^+$ | 6.4  | 3.6 |
| 247.10 | $C_{14}H_{15}O_4^+$ | 1.3  | 1.0 |
| 247.23 | $C_{14}H_{31}O_3^+$ | 3.3  | 1.5 |
| 257.25 | $C_{16}H_{33}O_2^+$ | 13.5 | 6.8 |
| 275.26 | $C_{16}H_{35}O_3^+$ | 12.8 | 6.7 |
| 299.07 | $C_{20}H_{11}O_3^+$ | 0.5  | 0.6 |

---

## References

Bosque, R. and Sales, J.: Polarizabilities of Solvents from the Chemical Composition, *Journal of Chemical Information and Computer Sciences*, 42, 1154-1163, 10.1021/ci025528x, 2002.

Chen, Y., Takeuchi, M., Nah, T., Xu, L., Canagaratna, M. R., Stark, H., Baumann, K., Canonaco, F., Prévôt, A. S. H., Huey, L. G., Weber, R. J., and Ng, N. L.: Chemical characterization of secondary organic aerosol at a rural site in the southeastern US: insights from simultaneous high-resolution time-of-flight aerosol mass spectrometer (HR-ToF-AMS) and FIGAERO chemical ionization mass spectrometer (CIMS) measurements, *Atmos. Chem. Phys.*, 20, 8421-8440, 10.5194/acp-20-8421-2020, 2020.

Farmer, D. K., Matsunaga, A., Docherty, K. S., Surratt, J. D., Seinfeld, J. H., Ziemann, P. J., and Jimenez, J. L.: Response of an aerosol mass spectrometer to organonitrates and organosulfates and implications for atmospheric chemistry, *P. Natl. Acad. Sci. USA*, 107, 6670-6675, 2010.

Gao, L., Song, J., Mohr, C., Huang, W., Vallon, M., Jiang, F., Leisner, T., and Saathoff, H.: Kinetics, SOA yields, and chemical composition of secondary organic aerosol from  $\beta$ -caryophyllene ozonolysis with and without nitrogen oxides between 213 and 313 K, *Atmos. Chem. Phys.*, 22, 6001-6020, 10.5194/acp-22-6001-2022, 2022.

Huang, W., Saathoff, H., Shen, X., Ramisetty, R., Leisner, T., and Mohr, C.: Chemical Characterization of Highly Functionalized Organonitrates Contributing to Night-Time Organic Aerosol Mass Loadings and Particle Growth, *Environ. Sci. Technol.*, 53, 1165-1174, 10.1021/acs.est.8b05826, 2019.

Kiendler-Scharr, A., Mensah, A. A., Friese, E., Topping, D., Nemitz, E., Prevot, A. S. H., Aijala, M., Allan, J., Canonaco, F., Canagaratna, M., Carbone, S., Crippa, M., Dall'Osto, M., Day, D. A., De Carlo, P., Di Marco, C. F., Elbern, H., Eriksson, A., Freney, E., Hao, L., Herrmann, H., Hildebrandt, L., Hillamo, R., Jimenez, J. L., Laaksonen, A., McFiggans, G., Mohr, C., O'Dowd, C., Otjes, R., Ovadnevaite, J., Pandis, S. N., Poulain, L., Schlag, P., Sellegri, K., Swietlicki, E., Tiitta, P., Vermeulen, A., Wahner, A., Worsnop, D., and Wu, H. C.: Ubiquity of organic nitrates from nighttime chemistry in the European submicron aerosol, *Geophys. Res. Lett.*, 43, 7735-7744, 2016.

Muller, M., Eicher, P., D'Anna, B., Tan, W., and Wisthaler, A.: Direct Sampling and Analysis of Atmospheric Particulate Organic Matter by Proton-Transfer-Reaction Mass Spectrometry, *Analytical Chemistry*, 89, 10889-10897, 10.1021/acs.analchem.7b02582, 2017.

Pagonis, D., Sekimoto, K., and de Gouw, J.: A Library of Proton-Transfer Reactions of H<sub>3</sub>O<sup>+</sup> Ions Used for Trace Gas Detection, *Journal of the American Society for Mass Spectrometry*, 30, 1330-1335, 10.1007/s13361-019-02209-3, 2019.

Piel, F., Müller, M., Winkler, K., Skytte af Sætra, J., and Wisthaler, A.: Introducing the extended volatility range proton-transfer-reaction mass spectrometer (EVR PTR-MS), *Atmos. Meas. Tech.*, 14, 1355-1363, 10.5194/amt-14-1355-2021, 2021.

Su, T.: Trajectory calculations of ion-polar molecule capture rate constants at low temperatures, *The Journal of Chemical Physics*, 88, 4102-4103, 10.1063/1.453817, 1988.

Xu, L., Suresh, S., Guo, H., Weber, R. J., and Ng, N. L.: Aerosol characterization over the southeastern United States using high-resolution aerosol mass spectrometry: spatial and seasonal variation of aerosol composition and sources with a focus on organic nitrates, *Atmos. Chem. Phys.*, 15, 7307-7336, 10.5194/acp-15-7307-2015, 2015.

Yáñez-Serrano, A. M., Filella, I., Llusà, J., Gargallo-Garriga, A., Granda, V., Bourtsoukidis, E., Williams, J., Seco, R., Cappellin, L., Werner, C., de Gouw, J., and Peñuelas, J.: GLOVOCS - Master compound assignment guide for proton transfer reaction mass spectrometry users, *Atmos. Environ.*, 244, 117929, <https://doi.org/10.1016/j.atmosenv.2020.117929>, 2021.

Yuan, B., Koss, A. R., Warneke, C., Coggon, M., Sekimoto, K., and de Gouw, J. A.: Proton-Transfer-Reaction Mass Spectrometry: Applications in Atmospheric Sciences, *Chemical Reviews*, 117, 13187-13229, 10.1021/acs.chemrev.7b00325, 2017.
